# Supplementary material for: Management of Donkeys in Assisted Interventions: A Snapshot
Source: MDPI journal article supplement (doi:10.3390/ani14050670), 2024-02-21
Supplement: s1 [file s1]

**Table S1.** Questionnaire on Donkey management in Assisted-Intervention Facilities

| 1. General                                                                                                                                                             | Yes | No |
|------------------------------------------------------------------------------------------------------------------------------------------------------------------------|-----|----|
| Specialized center in Animal Assisted Education and Therapy according to the national guidelines for Animal-Assisted Interventions (AAI)                               |     |    |
| All kinds of AAI (activities with recreational, educational and therapeutic purposes)                                                                                  |     |    |
| Activities with recreational purpose (AAA) only                                                                                                                        |     |    |
| Personnel with qualifications relevant to donkey's welfare<br>Ex. Master degree in veterinary medicine<br>Degree in animal husbandry<br>Animal Welfare Specializations |     |    |
| Staff responsible for cleaning, feeding and animal supervision                                                                                                         |     |    |
| Regular collaboration with a veterinarian trained in AAI<br>(once a month or more often)                                                                               |     |    |
| Sporadic collaboration with a veterinarian trained in AAI<br>(less than once a month)                                                                                  |     |    |
| Absence of collaboration with a veterinarian trained in AAI                                                                                                            |     |    |
| <b>2. Housing</b>                                                                                                                                                      |     |    |
| Paddock with shelter (tree walls)                                                                                                                                      |     |    |
| Stall with paddock and regulated access                                                                                                                                |     |    |
| Animal supplies                                                                                                                                                        |     |    |
| Home-made solutions                                                                                                                                                    |     |    |
| Ground stability or tendency of the paddock's terrain to remain dry, not to become muddy during bad weather                                                            |     |    |
| Grass-covered paddock<br>(to be assessed at the time of the visit)                                                                                                     |     |    |
| Presence of shaded area different from that provided by the shelter or the stall<br>(to be assessed at the time of the visit)                                          |     |    |
| Presence of environmental enrichment<br>(to be assessed at the time of the visit)                                                                                      |     |    |
| <b>3. Feeding</b>                                                                                                                                                      |     |    |
| Only hay as forage                                                                                                                                                     |     |    |
| Only straw as forage                                                                                                                                                   |     |    |
| Hay and straw as forage (mostly hay)                                                                                                                                   |     |    |
| Straw and hay as forage (mostly straw)                                                                                                                                 |     |    |
| Free access to pasture all year round                                                                                                                                  |     |    |
| Access to pasture regulated on a seasonal basis                                                                                                                        |     |    |
| Weekly supplementation of donkeys' diet with edible plants' shrubs                                                                                                     |     |    |
| Weekly supplementation of donkeys' diet with shrubs fruits and vegetables                                                                                              |     |    |
| Fruits and vegetables administered as reward during interaction with users                                                                                             |     |    |
| Mineral supplementation<br>Ex. salt in blocks                                                                                                                          |     |    |
| Rationed forage                                                                                                                                                        |     |    |
| Forage always available (administration <i>ad libidum</i> )                                                                                                            |     |    |
| Forage bale feeder                                                                                                                                                     |     |    |
| Feeding troughs                                                                                                                                                        |     |    |

|                                                                                                                                        |  |  |
|----------------------------------------------------------------------------------------------------------------------------------------|--|--|
| Suspended net                                                                                                                          |  |  |
| Forage on the ground                                                                                                                   |  |  |
| <b>3. Health</b>                                                                                                                       |  |  |
| Weight monitoring: weight measurement or estimation through chest circumference and height at the withers (once a month or more often) |  |  |
| Dental check-up and corrective interventions (once a year)                                                                             |  |  |
| Hoof check and potential trimming (once every three month or more often)                                                               |  |  |
| Hoof check and potential trimming (less than once every three month)                                                                   |  |  |
| Vaccination for Equine Influenza and Tetanus (once a year)                                                                             |  |  |
| Vaccination for Nile Disease (once a year)                                                                                             |  |  |
| No vaccinations                                                                                                                        |  |  |
| Endoparasites monitoring through fecal exam and selective treatment (once a year)                                                      |  |  |
| Blind administration of antiparasitic drug (once or twice a year)                                                                      |  |  |
